# Supplementary material for: Can Brain Volume-Driven Characteristic Features Predict the Response of Alzheimer’s Patients to Repetitive Transcranial Magnetic Stimulation? A Pilot Study
Source: MDPI journal article supplement (doi:10.3390/brainsci14030226), 2024-02-28
Supplement: s1 [file s1]

### Supplementary Data:

We conducted a whole-brain voxel-based morphometry (VBM) on gray matter (GM) and white (WM) using a threshold of uncorrected  $p$  of 0.001 to find the differences between responders and non-responders. As shown in Supplementary Table 1, the responders had a lower GM volume in the right superior and middle frontal gyrus regions relative to non-responders. In contrast, the non-responders had a lower GM in the left occipital gyrus and right rectal gyrus than the responders. In the WM analysis, a trend of lower WM volume was in the left fusiform gyrus, left middle occipital gyrus, right calcarine fissure & surrounding cortex, and left inferior temporal gyrus of the responders than the non-responders. In the opposite contrast (responders > non-responders), no difference was observed in WM.

**Supplementary Table S1:** Whole-brain voxel-based morphometry (VBM) results using the uncorrected  $p$  of 0.001 to find the differences between responders and non-responders in gray matter (GM) and white (WM).

| Extent                                    | Voxel level-<br>$P_{\text{uncorr}}$ | T values | MNI coordinates<br>(x, y, z) (mm) | Side | Regions                                |
|-------------------------------------------|-------------------------------------|----------|-----------------------------------|------|----------------------------------------|
| <b>GM: responders &lt; non-responders</b> |                                     |          |                                   |      |                                        |
| 1253                                      | 0.000                               | 4.60     | 22, 56, 20                        | R    | Superior frontal gyrus                 |
|                                           | 0.000                               | 4.06     | 22, 48, 22                        | R    | Superior frontal gyrus                 |
|                                           | 0.001                               | 3.38     | 32, 42, 18                        | R    | Middle frontal gyrus                   |
| 16                                        | 0.001                               | 3.43     | 38, 26, 30                        | R    | Middle frontal gyrus                   |
| <b>GM: responders &gt; non-responders</b> |                                     |          |                                   |      |                                        |
| 131                                       | 0.000                               | 3.56     | -22, -88, 32                      | L    | Superior occipital gyrus               |
| 9                                         | 0.001                               | 3.27     | 4, 50, -26                        | R    | Rectal gyrus                           |
| <b>WM: responders &lt; non-responders</b> |                                     |          |                                   |      |                                        |
| 379                                       | 0.000                               | 4.12     | -40, -72, 4                       | L    | Middle occipital gyrus                 |
| 668                                       | 0.000                               | 3.88     | -34, -48, -6                      | L    | Fusiform gyrus                         |
|                                           | 0.000                               | 3.63     | -42, -50, -14                     | L    | Fusiform gyrus                         |
|                                           | 0.001                               | 3.24     | -36, -58, -10                     | L    | Fusiform gyrus                         |
| 52                                        | 0.000                               | 3.55     | 2, -86, 14                        | R    | Calcarine fissure & surrounding cortex |
| 80                                        | 0.000                               | 3.44     | -34, -64, -14                     | L    | Fusiform gyrus                         |
| 35                                        | 0.001                               | 3.39     | -46, -34, -18                     | L    | Inferior temporal gyrus                |
| <b>WM: responders &gt; non-responders</b> |                                     |          |                                   |      |                                        |
| No differences                            |                                     |          |                                   |      |                                        |

MNI: Montreal Neurological Institute, L: left, R: right. Regions corresponding to the MNI coordinates are found in the xjView toolbox (<https://www.alivelearn.net/xjview>).
